# Supplementary material
Source: MDPI journal article supplement (https://www.mdpi.com/2076-3417/11/2/699)
Supplement: s1 [file s1]

## Piezoelectric material property commands

```
mpdel,all,matid      To delete material property it was assigned by default method.
!*
et,matid,226,1001     To change the mesh type from SOLID186 to SOLID226 with keytops : 1001 (DOFs = Ux, Uy, Uz and Vol
!                     (piezoelectric coupling)).
! PZT-4 z-polarized
! Stiffness
!
TB,ANEL,matid
TBDATA, 1, 1.3900E+11, 7.7837E+10, 7.4284E+10
TBDATA, 7, 1.3900E+11, 7.4284E+10,
TBDATA, 12, 1.1541E+11,
TBDATA, 16, 3.0581E+10,
TBDATA, 19, 2.5641E+10,
TBDATA, 21, 2.5641E+10,
!
! Piezo
!
TB,PIEZ,matid
TBDATA, 3, -5.2
TBDATA, 6, -5.2
TBDATA, 9, 15.1
TBDATA, 14, 12.7
TBDATA, 16, 12.7
!
! Permittivity
!
EMUNIT,EPZRO, 8.85E-12 To assign Relative permittivity and permittivity constant
MP,PERX,matid, 1475    of PZT4 to the geometry.
MP,PERY,matid, 1475
MP,PERZ,matid, 1300
!
! Density
!
MP,DENS,matid, 7500    To assign density of PZT4 to the geometry.
```

# Water material property commands

```
/PREP7
```

```
!
```

```
CMSEL,S,Water
```

```
ESEL,R,ENAME, , 186
```

```
*GET,iNum186,ELEM,0,COUNT
```

```
*IF,iNum186,GT,0,THEN
```

```
*GET,iMaxEType,ETYP,0,NUM,  
MAX
```

```
ET,iMaxEType+1,220, , , 0
```

```
KEYOPT,iMaxEType+1,1,0
```

```
KEYOPT,iMaxEType+1,2,1
```

```
!
```

```
*GET,iMaxMat,MAT,0,NUM,MAX
```

```
MP,SONC,iMaxMat+1,1533.5
```

```
MP,DENS,iMaxMat+1,990.15
```

```
MP,VISC,iMaxMat+1,0.0005958
```

```
MP,BVIS,iMaxMat+1,0
```

```
MP,KXX,iMaxMat+1,0
```

```
MP,C,iMaxMat+1,0
```

```
MP,CVH,iMaxMat+1,0
```

```
!
```

```
*GET,iMaxReal,ELEM,,RELM
```

```
R,iMaxReal+1,2E-05,101325
```

```
EMODIF,ALL,TYPE,iMaxEType+1
```

```
EMODIF,ALL,MAT,iMaxMat+1
```

```
EMODIF,ALL,REAL,iMaxReal+1
```

```
*ENDIF
```

```
!
```

```
/SOLU
```

```
ALLSEL,ALL
```

```
OUTRES,FGRAD,ALL
```

```
!
```

To select a subset of water (acoustic) domain.

To change the mesh type from SOLID186 to FLUID220  
with key options when KEYOPT (2) : 1 (DOFs = P)

To assign material property of water at each temperature  
to geometry of water.

To define the reference pressure and static pressure.

Controls the solution data of element nodal gradients  
written with every sub-step.

# Stainless steel material property commands

```
CMSEL,S,SS
ESEL,R,ENAME,,186
*GET,iNum186,ELEM,0,COUNT
*IF,iNum186,GT,0,THEN
*GET,iMaxEType,ETYP,0,NUM,
MAX
ET,iMaxEType+1,220,,0
KEYOPT,iMaxEType+1,1,0
KEYOPT,iMaxEType+1,2,0
KEYOPT,iMaxEType+1,6,1
!
*GET,iMaxMat,MAT,0,NUM,MAX
MP,SONC,iMaxMat+1,5590
MP,DENS,iMaxMat+1,7790
MP,VISC,iMaxMat+1,0
MP,BVIS,iMaxMat+1,0
MP,KXX,iMaxMat+1,0
MP,C,iMaxMat+1,0
MP,CVH,iMaxMat+1,0
!
*GET,iMaxReal,ELEM,,RELM
R,iMaxReal+1,2E-05,101325
EMODIF,ALL,TYPE,iMaxEType+1
EMODIF,ALL,MAT,iMaxMat+1
EMODIF,ALL,REAL,iMaxReal+1
*ENDIF
```

To select a subset of stainless steel (acoustic) domain.

To change the mesh type from SOLID186 to FLUID220 with key options when KEYOPT (2) : 0 (DOFs =  $U_x$ ,  $U_y$ ,  $U_z$  and P), KEYOPT (6) : 1 (incompressible domain)

To assign material property of stainless steel to geometry of stainless steel.

To define the reference pressure and static pressure.

## Fluid solid interface and Infinite surface commands

|                            |                                                             |
|----------------------------|-------------------------------------------------------------|
| <b>CMSEL,S, FSI_</b>       | To selects a subset of FSI_ face.                           |
| <b>ESEL,S,ENAME, , 220</b> | To change the element field type to FLUID220.               |
| <b>SF, ALL, FSI</b>        | To set the degree of freedoms on all node at the face       |
| <b>ALLSEL, ALL</b>         | with $U_x$ , $U_y$ , $U_z$ and P.                           |
|                            |                                                             |
| <b>CMSEL,S, INF_</b>       | To selects a subset of INF_ face.                           |
| <b>ESEL,S,ENAME, , 220</b> | To change the element field type to FLUID220.               |
| <b>SF, ALL, INF</b>        | To set Robin radiation boundary condition on Exterior face. |
| <b>ALLSEL, ALL</b>         |                                                             |

# Voltage commands

|                                                                                                                                                                                                                                                                                                                                                                                                            |                                                                                                                            |
|------------------------------------------------------------------------------------------------------------------------------------------------------------------------------------------------------------------------------------------------------------------------------------------------------------------------------------------------------------------------------------------------------------|----------------------------------------------------------------------------------------------------------------------------|
| <pre>fini !* /units, MKS</pre>                                                                                                                                                                                                                                                                                                                                                                             | To define unit to MKS unit.                                                                                                |
| <pre>/prep7 cmsel, s, Bot_Piezo cp, 1, volt, all *get, nbot, node, , num, min d, nbot, volt, 0 nsel, all cmsel, all !* !</pre>                                                                                                                                                                                                                                                                             | To set voltage on the subset of Bot_Piezo to 0.                                                                            |
| <pre>cmsel, s, Top_Piezo cp, 2, volt, all *get, ntop, node, , num, min !* alls, all !* !* frq = 40000 vlt = 220 cyl = 30 npt = 800 !* *dim, v_top, table, npt, 1, 1, time *do, i, 1, npt, 1   v_top (i, 0) = ( ( ( 1/frq ) *cyl ) /npt ) *i   tloop = ( ( ( 1/frq ) *cyl ) /npt ) *i   v_top (i, 1) = vlt *sin ( ( tloop / ( 1/frq ) ) *2 *3.141593 ) *enddo !* d, ntop, volt, %v_top% !</pre>             | To set voltage on the subset of Top_Piezo with below loop.                                                                 |
| <pre>cmsel, s, Top_Piezo1 cp, 3, volt, all *get, ntop, node, , num, min !* alls, all !* !* frq2 = 28000 vlt = 220 cyl2 = 30 npt = 800 !* *dim, v_top2, table, npt, 1, 1, time *do, i, 1, npt, 1   v_top2 (i, 0) = ( ( ( 1/frq2 ) *cyl2 ) /npt ) *i   tloop2 = ( ( ( 1/frq ) *cyl2 ) /npt ) *i   v_top2 (i, 1) = vlt *sin ( ( tloop / ( 1/frq2 ) ) *2 *3.141593 ) *enddo !* d, ntop, volt, %v_top2% !</pre> | To set frequency (frq), voltage (vlt), cycle (cyl) and number of time point (npt) follow as table ...                      |
| <pre>fini !* /solu tintp, , 0.25, 0.5, 0.5</pre>                                                                                                                                                                                                                                                                                                                                                           | To set 1 <sup>st</sup> and 2 <sup>nd</sup> order transient integration parameter that required for piezoelectric analysis. |
|                                                                                                                                                                                                                                                                                                                                                                                                            | ! Required for piezo                                                                                                       |
